# Supplementary material for: High-Resolution Melting (HRM) of the Cytochrome B Gene: A Powerful Approach to Identify Blood-Meal Sources in Chagas Disease Vectors
Source: PubMed Central journal article supplement (PMC3289613; doi:10.1371/journal.pntd.0001530), 2012-02-28
Supplement: pntd.0001530.s003.pdf [file pntd.0001530.s003.pdf]

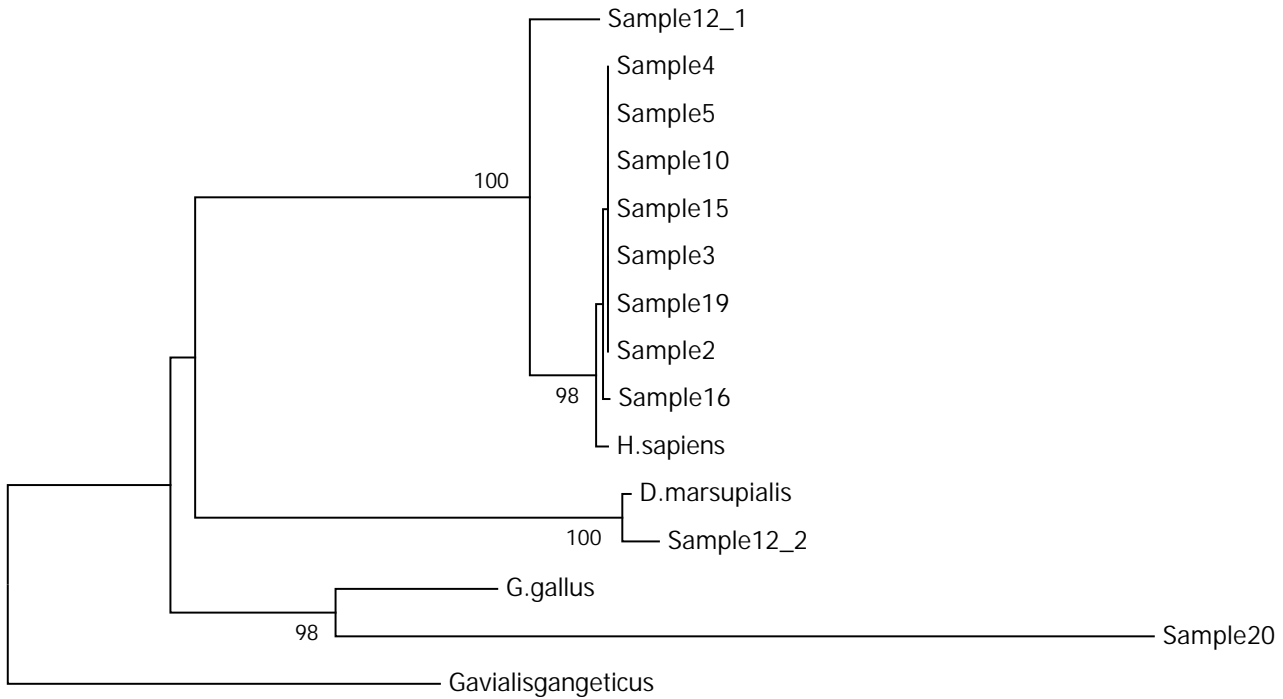

0.05
